# Supplementary material for: Antagonist of Growth Hormone-Releasing Hormone Potentiates the Antitumor Effect of Pemetrexed and Cisplatin in Pleural Mesothelioma
Source: MDPI journal article supplement (doi:10.3390/ijms231911248), 2022-09-24
Supplement: s1 [file s1]

# Antagonist of growth hormone-releasing hormone potentiates the antitumor effect of pemetrexed and cisplatin in pleural mesothelioma

Gesmundo et al.

## Supplemental Material

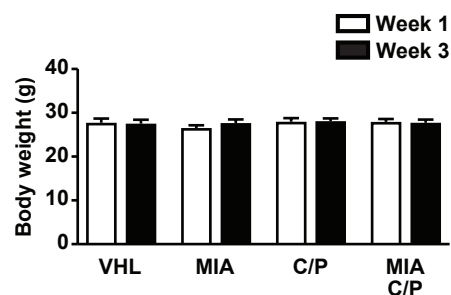

**Figure S1.** Body weight variation in mice xenografted with MSTO-211H PM cells. Body weight was assessed at week 1 and week 3 in mice treated with vehicle (VHL), MIA-690, cisplatin and pemetrexed (C/P) or the combination of MIA/C/P. Results are mean  $\pm$  SEM. (n = 9 in each group).
